# Supplementary material for: Impact of Isolated High Home Systolic Blood Pressure and Diabetic Nephropathy in Patients with Type 2 Diabetes Mellitus: A 5-Year Prospective Cohort Study
Source: J Clin Med. 2021 Apr 29;10(9):1929. doi: 10.3390/jcm10091929 (PMC8124698; doi:10.3390/jcm10091929)
Supplement: Supplementary file 1 [file jcm-10-01929-s001.zip › jcm-1165655-supplementary.pdf]

## Supplementary files

Table S1. The comparison of arterial stiffness among patients with isolated high HSBP or High-HBP.

|                | isolated high HSBP | High-HBP         | <i>P</i> Value |
|----------------|--------------------|------------------|----------------|
| baPWV (cm/sec) | 1844 (1645-2059)   | 1726 (1509-1995) | 0.053          |

Data was expressed as median (interquartile range). The difference between two group was evaluated by Manne-Whitney U test. HBP, home blood pressure; HSBP, home systolic blood pressure; baPWV, brachial ankle pulse wave velocity.

Table S2. The comparison of the patients with isolated high HSBP or isolated high HDBP.

|                             | Isolated high HSBP  | Isolated high HDBP  | <i>P</i> Value |
|-----------------------------|---------------------|---------------------|----------------|
| Age (year)                  | 69 (63-75)          | 60 (45-65)          | <0.01          |
| Duration of diabetes (year) | 11 (7-20)           | 8 (4-11.3)          | <0.01          |
| HSBP (mmHg)                 | 133.3 (128.8-139.6) | 120.0 (116.9-122.2) | <0.01          |
| baPWV (cm/sec)              | 1844 (1645-2059)    | 1491 (1281-2150)    | <0.01          |

Data was expressed as median (interquartile range). The difference between two group was evaluated by Manne-Whitney U test. HBP, home blood pressure; HSBP, home systolic blood pressure; baPWV, brachial ankle pulse wave velocity.

Table S3. The comparison of patients according to systolic blood pressure.

|                                         | SBP ≥135 mmHg | SBP <135 mmHg | <i>P</i> Value |
|-----------------------------------------|---------------|---------------|----------------|
| age                                     | 66.2          | 61.6          | P< 0.01        |
| Use of antihypertensive medications (%) | 69.1          | 45.5          | P< 0.01        |

Data was expressed as mean or %. The difference between group was evaluated by ManneWhitney U test. SBP, systolic blood pressure.
